# Supplementary material for: Acute myocardial infarction and diagnosis-related groups: patient classification and hospital reimbursement in 11 European countries
Source: PubMed Central journal article supplement — Eur Heart J. 2013 Jan 30;34(26):1972–81. doi: 10.1093/eurheartj/ehs482 (PMC3703310; doi:10.1093/eurheartj/ehs482), 2013-01-30
Supplement: supp_ehs482_ehs482supp.pdf [file supp_ehs482_ehs482supp.pdf]

**Webfigure 1:** Comparison of quasi price indices for the AMI case vignettes in eleven European countries (the price index of the index case equals 1.0 in each country)

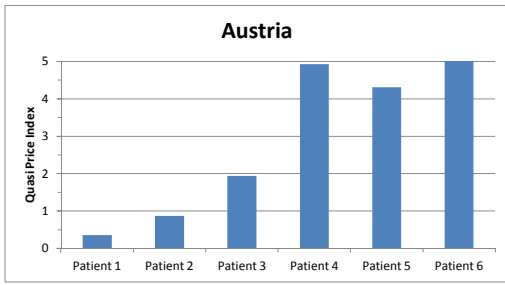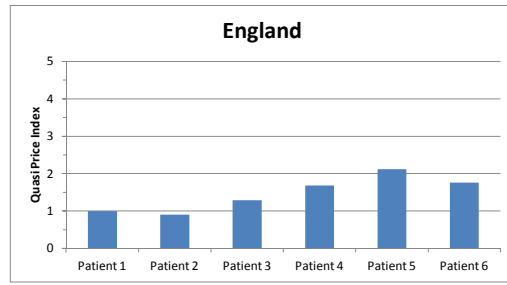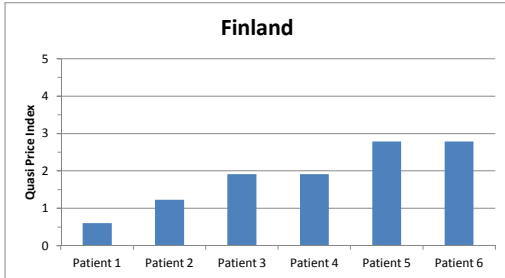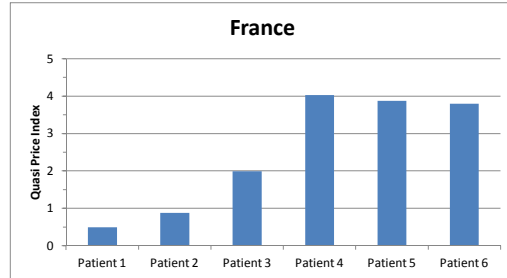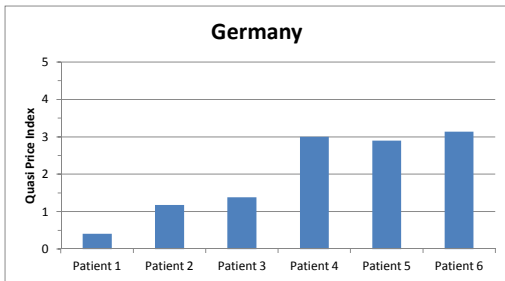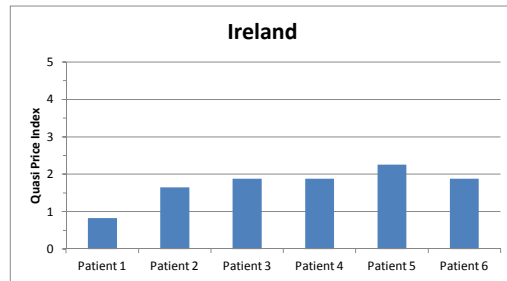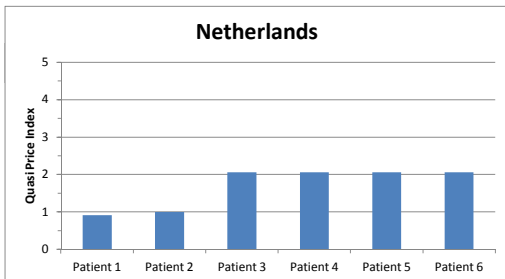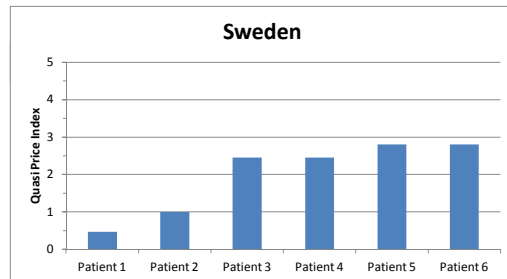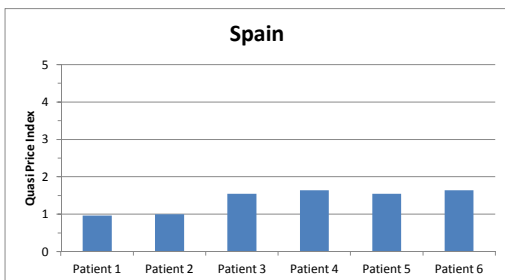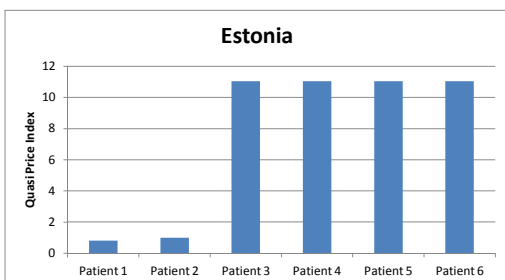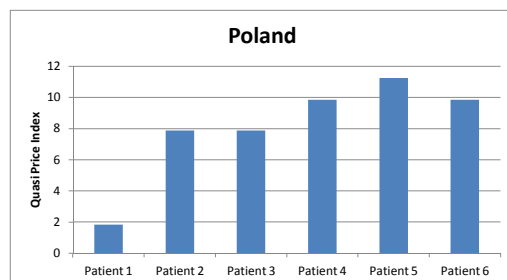

**Webtable 1:** Specification of Case Vignettes: Relevant Diagnosis and Procedure Codes.

|            | Primary diagnosis <sup>1</sup> | Secondary diagnoses        | Procedures          |               |                  |                           | Death during admission | LOS |             |
|------------|--------------------------------|----------------------------|---------------------|---------------|------------------|---------------------------|------------------------|-----|-------------|
|            |                                |                            | PCI <sup>2</sup>    | Type of stent | Number of stents | Number of treated vessels |                        |     | Angiography |
| Index case | I21.4                          | no                         | no                  | -             | 0                | -                         | No                     | no  | 6 days      |
| Patient 1: | I21.0                          | R57.0, E11.8, I69.3,       | no                  | -             | 0                | -                         | No                     | yes | 1 day       |
| Patient 2: | I21.4                          | no                         | no                  | -             | 0                | -                         | 88.55                  | no  | 4 days      |
| Patient 3: | I21.0                          | no                         | 36.06, 00.66        | BMS           | 1                | 1                         | No                     | no  | 5 days      |
| Patient 4: | I21.0                          | no                         | 36.07, 00.66, 00.48 | DES           | >4               | 1                         | No                     | no  | 15 days     |
| Patient 5: | I21.0                          | E11.8, I69.3, I50.1, T81.0 | 36.06, 00.66, 00.48 | BMS           | >4               | 1                         | 88.55                  | no  | 25 days     |
| Patient 6: | I22.0                          | I11.0, I23.2, I25.5, I69.3 | 36.07, 00.66, 00.48 | DES           | >4               | 2                         | 88.55                  | yes | 2 days      |

<sup>1</sup>In France, the ICD-10 code may consist of six digits, which specify amongst others the duration since onset of symptoms. The patients were classified as if symptoms had started less than 24 hours ago.

<sup>2</sup>In the Netherlands, physicians have to code whether PCIs were performed as emergency procedures. If a PCI is performed as an emergency procedure, it leads to the classification of patients into specific DRGs. For the classification of case vignettes into DRGs, it was assumed that all PCIs would be performed as emergency procedures.

PCI = Percutaneous Coronary Intervention; DES = Drug Eluting Stent; BMS = bare metal stent; LOS = Length of Stay.

Relevant ICD-10 codes: I21.0 = acute transmural myocardial infarction of anterior wall; I21.4 = acute subendocardial myocardial infarction; I22.0 = subsequent myocardial infarction of anterior wall; E11.8 = non-insulin-dependent diabetes mellitus, with unspecified complications; I11.0 = hypertensive heart disease with (congestive) heart failure; I23.2 = ventricular septal defect as current complication following acute myocardial infarction; I25.5 = ischaemic cardiomyopathy; I50.1 = heart failure: left ventricular failure (NYHA IV if specifiable in national coding); I69.3 = sequelae of cerebral infarction; R57.0 = cardiogenic shock; T81.0 = haemorrhage and haematoma complicating a procedure, not elsewhere classified.

Relevant ICD-9CM codes: 00.66 Percutaneous transluminal coronary angioplasty [PTCA] or coronary atherectomy; 36.06 = insertion of non-drug-eluting coronary artery stent(s); 36.07 = insertion of drug-eluting coronary artery stent(s); 88.55 = coronary arteriography using a single catheter; 00.48 = insertion of four or more vascular stents.
